# Supplementary material
Source: Elsevier journal article supplement (https://www.sciencedirect.com/science/article/pii/S2173574319301704)
Supplement: mmc2 [file S2173574319301704:mmc2.docx]

**Anexo 2: Tratamiento convencional y criterios de resistencia**

| **Situación Clínica** | **Tratamiento** | **Criterio de resistencia** |
| --- | --- | --- |
| **Artritis** | Tratamiento escalonado según respuesta y gravedad  -AINE  -Glucocorticoides (dosis bajas-medias, 5-15 mg/día)  -Antipalúdicos (Hidroxicloroquina)  -Metotrexato  -Leflunomida | Fallo a AINE, GC a dosis bajas, antipalúdicos y metotrexato (dosis de 20 mg/semana durante 3 meses) |
| **Miositis** | Tratamiento escalonado según respuesta y gravedad  -Glucocorticoides (dosis altas, 0,5-1 mg/k/día)  -Azatioprina  -Metotrexato  -Cicloporina-A o Tacrólimus  -Micofenolato Mofetilo  -Ciclofosfamida iv  -Inmunoglobulinas iv | Fallo a GC más, al menos, un inmunosupresor |
| **Neumopatía Intersticial** | -Pulsos de metilprednisolona (1g/día x 3 días) en situaciones agudas graves  -Glucocorticoides (dosis altas, 0,5-1 mg/k/día)  -En función de la gravedad:  · Ciclofosfamida iv o,  · Azatioprina o,  · Micofenolato Mofetilo | Fallo a GC más, al menos, un inmunosupresor |
| **Vasculitis (afectación cutánea grave y extensa o sistémica)** | -Pulsos de metilprednisolona (1g/día x 3 días) en situaciones agudas graves  -Glucocorticoides (dosis altas, 0,5-1 mg/k/día)  -En función de la gravedad:  · Ciclofosfamida iv o,  · Azatioprina o,  · Micofenolato Mofetilo  -Valorar plasmaféresis en casos seleccionados | Fallo a GC más, al menos, un inmunosupresor |
| **Glomerulonefritis membrano-proliferativa o nefritis intersticial activa grave** | -Pulsos de metilprednisolona (1g/día x 3 días) en situaciones agudas graves  -Glucocorticoides (dosis altas, 0,5-1 mg/k/día)  -En función de la gravedad:  · Ciclofosfamida iv o,  · Micofenolato Mofetilo | Fallo a GC más, al menos, un inmunosupresor |
| **Neuropatía periférica sensitiva pura**  **Ganglionopatía**  **Radiculopatía sensitiva** | -Inmunoglobulinas IV a altas dosis | Fallo a inmunoglobulinas IV a altas dosis |
| **Polineuropatía periférica sensitivo-motora**  **Mononeuritis múltiple** | -Pulsos de metilprednisolona (1g/día x 3 días)  -Glucocorticoides (dosis altas, 0,5-1 mg/k/día)  -Ciclofosfamida iv o,  -Micofenolato Mofetilo  -Valorar plasmaféresis en casos seleccionados | Fallo a GC más, al menos, un inmunosupresor |
| **Mielitis** | -Pulsos de metilprednisolona (1g/día x 3 días)  -Glucocorticoides (dosis altas, 0,5-1 mg/k/día)  -Ciclofosfamida iv  -Valorar plasmaféresis en caso de necesidad | Fallo a GC más, al menos, un inmunosupresor.  Puede usarse terapia inicial combinada de dosis altas de GC más ciclofosfamida más rituximab. |
| **Parotidomegalia** | -AINE  - Dosis medias-altas de GC | Fallo a GC |
